# Supplementary material for: Enhanced Immunogenicity of Mitochondrial-Localized Proteins in Cancer Cells
Source: Oxford University Press journal article supplement (doi:10.1158/2326-6066.cir-19-0467), 2020-03-23
Supplement: 23266066cir190467-sup-224450_2_supp_6075855_q753v6.docx [file 23266066cir190467-sup-224450_2_supp_6075855_q753v6.docx]

**Supplementary Figures**

**
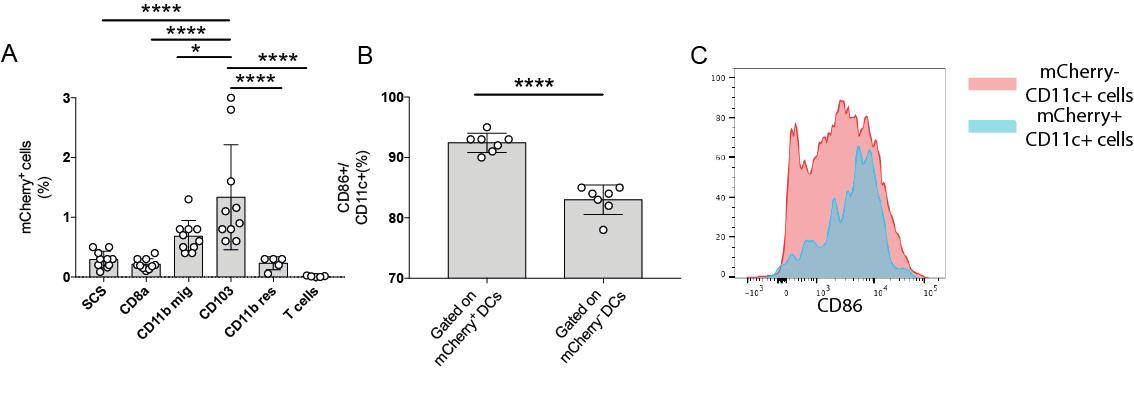
**

**Figure S1. Mitochondrial localised OVA is taken up CD103+ and CD11b+ DC during tumor development. (A)** Mice were injected with B16 cells encoding mtOVA fused with mCherry. On day 14 mice were sacrificed and cells from draining lymph nodes were stained and different subset of macrophages and dendritic cells were identified. Frequency is shown of mCherry positive cells in SCS, and CD103, CD11b and CD8α DCs. *****p*<0.00001, ** *p*<0.001, **p*<0.01 (one-way ANOVA followed by Tukey ́s post-test).(**B**-**C)** Frequency of CD86 positive DCs of CD11c+mCherry+ or CD11c+mCherry- cells (left panel), a representative overlay is shown (right panel). Two-tailed Student's t-test was used for comparing values *****p* < 0.0001, ****p* < 0.001.

**Figure S2** **Mitochondrial localised proteins generate higher frequency CD8+ T cell responses in a cross-presentation model.** **(A-B)** Representative dual colour confocal images of CT26 cells stably expressing NY-ESO-1 localised in the cytosol (CT26 cytoNY-ESO-1, lower panel) or in the mitochondria (CT26 mtNY-ESO-1, upper panel) with cytosolic GFP (green) and immunostaining (red) for NY-ESO-1. A pixel-wise Pearson's co-localisation test to quantify the co-localisation of cytosolic GFP and NY-ESO-1 was performed, (values of 1 indicate complete co-localisation, 0 indicates no co-localisation) results are shown in the right panel. Results are representative of 2 independent experiments.(**C**) interferon gamma (C, upper panel), TNF alpha (C, lower panel) after NY-ESO-1 peptide restimulation detected by intracellular staining assay. Representative dot plot of tetramer staining (**D**). Gating strategy is reported. **(C)** CT26 expressing OVA either in the cytosol or in the mitochondria were sorted for different levels of GFP, as in both cell lines the reporter protein GFP was downstream an IRES sequence on the same transgene. The levels of GFP were quantified by flow cytometry and graph reporting the MFI of GFP in the three sorted cell lines (High, Medium and Low) are shown. **(D)** A correlation between the level of GFP and the level of OVA (tagged with HA-tag) in the cell lines are shown by western blot analysis. Western blotting was performed with indicated antibodies. **(E)** Groups of mice were injected subcutaneously with CT26 expressing different levels of mtOVA or cytoOVA. Mice were scarified 7 days after the injection, splenocytes were then stimulated with the SIINFEKL peptide for 5 hours in presence of Brefeldin A, and IFNγ-secreting cells were identified by flow cytometry. Results show that independently from the level of the expression of the transgene, CT26 mtOVA is superior than CT26 cytoOVA in inducing a CD8+ T cell response. ****p*<0.00001, ** *p*<0.001, **p*<0.01 (one-way ANOVA followed by Tukey ́s post-test). **(F)** CD8+ T cells were isolated from OT-I mice, labelled with CFSE and transferred into syngeneic (C57BL/6) recipient mice. Adoptively transferred mice were injected with CT26 encoding OVA localised in mitochondria or in the cytosol (n=5). Proliferation of OT-I CD8+ T cells was evaluated on day 3 after tumor injection by CFSE dilution. Data are representative of two independent experiments with n=5 and values are expressed in mean ± SD. One-way ANOVA followed by Tukey ́s post-test was used to compare values *****p* < 0.0001, ****p* < 0.001 **(G)** CT26 expressing OVA in the cytosol or in the mitochondria were incubated in tissue culture medium containing the proteasome inhibitor epoxomicin at (0.2, 0.02 μM) or DMSO for 3 hours. Western blotting was performed with indicated antibodies.

**Figure S3**. **Characterization of B16 encoding for OVA localised in different compartments.**

B16 cytoOVA, mtOVA, mod cytoOVA and GFP cells expressing the same levels of GFP were sorted by FACS. **(A)** Expression levels of the OVA transgene were measured by qPCR. **(B)** B16 cytoOVA, mtOVA, mod cytoOVA and GFP cells were labelled with CFSE and seeded onto tissue culture flasks and incubated for 24 or 72 hours. The percentage of proliferating cells were measured by FACS analysis.(**C**)Representative dot plot of interferon gamma intracellular staining assay after OVA peptide restimulation, gating strategy is reported **(D)** Groups of wild type or SRA/MARCO knockout mice were injected with B16 mtOVA SC in the flank (1x106 cells/mouse). On day 7, splenocytes were restimulated with OVA257-264 peptide (SIINFEKL) for 5 hours and then IFNγ secreting cells were identified by ICS. Data are representative of two independent experiments with n=4 and values are expressed as mean ± SD (one-way ANOVA followed by Tukey ́s post-test ****p*<0.0001).

**Figure S4.** **Subcellular location of OVA determines the efficiency of direct presentation in Lewis Lung carcinoma cells. (A)** Gating strategy for *ex vivo* identification and characterization of B16 cells, **(B)** a representative histogram is shown.(**C**) B16 mtOVA and cytoOVA cells were stimulated with IFNγ gamma and TNFα alone or in combination. Cells were co-cultured with OT-I CD8+ T cells (ratio 1:40) overnight and OT-I stained for extracellular markers (CD8α, CD69, CD25) and viability stain. The frequency of activated OT-I (CD69+CD25+ cells) is shown. **(D)** LLC cells encoding for mtOVA or cytoOVA were stained withanti H-2Kb-OVA257-264  antibody, results are expressed as MFI. **(E)** Groups of mice (n=6) were injected on day -2, 0 and 5 with an anti-CD8 antibody (clone 2.43) or an isotype control. On day 0, mice were injected subcutaneously with B16 mtOVA or cytoOVA tumor cells (1.5x105 cells/mouse). Tumor from immunocompetent mice (clear bar) or CD8+ T cells depleted mice (grey bar) were stained withanti H-2Kb-OVA257-264  antibody, results are expressed as MFI. Data are representative of two independent experiments with n=5 and values are expressed as mean ± SD. (**C**-**D**) *****p*<0.00001, ***p*<0.001, **p*<0.01 (one-way ANOVA followed by Tukey ́s post-test).


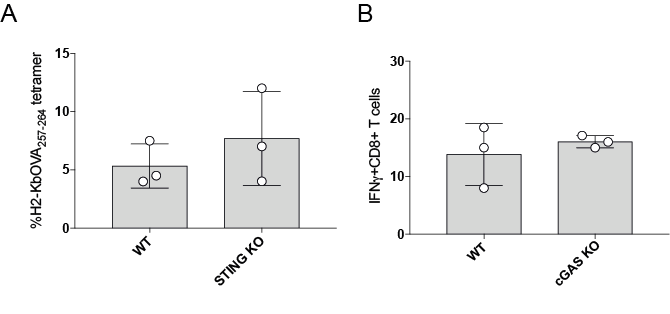


**Figure S5. STING** **knockout and cGAS knockout mice primed with full length recombinant OVA mount a high frequency OVA257-264 specific T cell response.**

Groups of 3 C57BL/6, STING knockout or cGAS knockout mice were injected intravenously with soluble OVA (0.4mg) in combination with the adjuvants TLR4 agonist MPL-A(25µg) and the iNKT cell agonist IMM60 (1µg).Seven days after the injection, splenocytes were either stained with tetrameric H-2Kb/OVA257-264 to determine the proportion of OVA257-264 specific CD8+ T cell or restimulated with the OVA257-264 peptide (SIINFEKL) and the production of IFNγ was assessed by ICS.

**
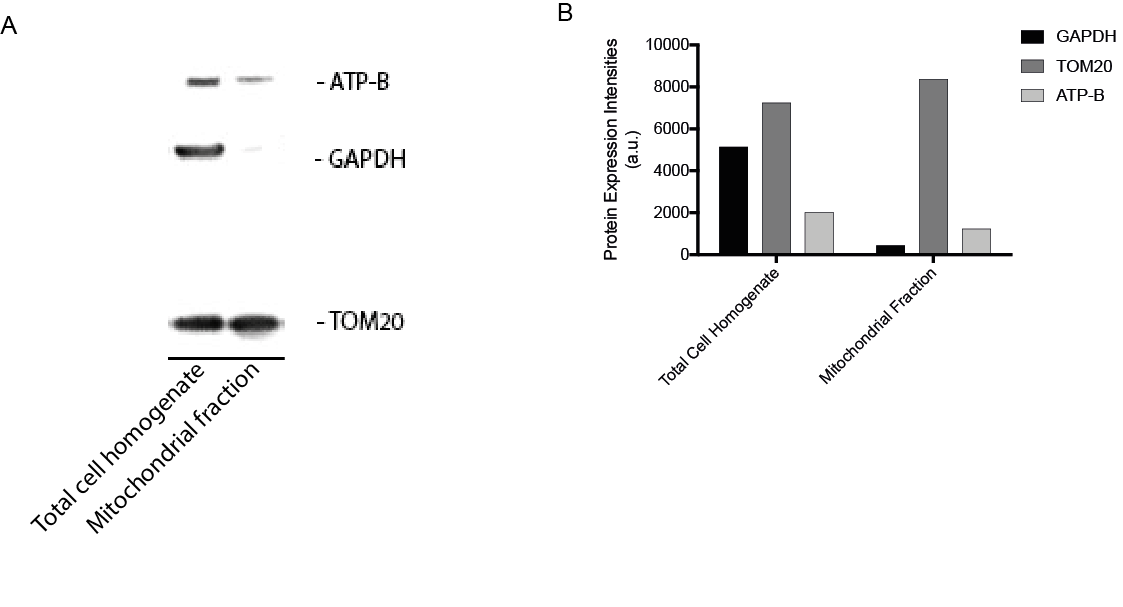
**

**Figure S6.** **Quality of the mitochondrial preparation used for vaccination experiments** Purity of the mitochondrial preparation was assessed by western blot. **(A-B)** Western blot analysis was performed on mitochondrial enriched fraction (10 μg of lysate) and whole cell lysate (10 μg of lysate) with indicated antibodies. GAPDH is enriched in the cytosolic fraction while TOM20 and ATP-B are enriched in the mitochondrial fraction. All three proteins are present in the total cell homogenate.

**Figure S7. Protective vaccination of naïve C57BL/6 mice with mitochondria purified from B16 tumors.** **(A)** Groups of mice (n=10) were injected on day -12 with mitochondria isolated from B16 or from MAFs. On day 0, mice were injected subcutaneously with B16 cells (1.5x105 cells/mouse). Growth curve of each individual mouse are shown **(B)** Groups of C57BL/6 mice were injected with mitochondria isolated from B16 cells. On day 10 after injection mice were challenged with B16 cells (left panel) or Lewis lung carcinoma (right panel) (1.5x105 cells/mouse injected SC in the flank). Growth curve of each individual mouse are shown. Data are representative of two independent experiments with n=5 and values are expressed as mean ± SD. **(C)** Groups of mice (n=5-6) were injected on day -12 with mitochondria isolated from B16 or vehicle. On days -2, 0 and 5 mice were injected with an anti CD8 antibody (clone 2.43) or an isotype control. On day 0, mice were injected subcutaneously with B16 tumor cell line (1.5x105 cells/mouse). Growth curve of each individual mouse are shown. Data are representative of two independent experiments with n=5 and values are expressed as mean ± SD . (**A-C**) . Vehicle and vaccinated mice have been compared using Two-tailed Student's t-test *****p* < 0.0001, ****p* < 0.001, ***p* < 0.01 at each time point.

**Figure S8. Identification of CD8+ T-cell clones specific for mitochondrial proteins in a cancer patient.** Endometrial cancer patient’s PBMCs were stimulated and expanded in the presence of each peptide, and HLA-A2 tetramers loaded with mitochondrial (upper panel) or not mitochondrial (lower panel) derived peptides were used to assess the presence of neoantigen-specific T cells in the expanded PBMC. Representative plots of the tetramer staining are shown. The frequency and the sequence of each peptide is reported.

| **Supplementary table 1. List of antibodies used in the study.** | | | | |
| --- | --- | --- | --- | --- |
| **target** | **clone** | **source** |  | **application** |
| Anti OVA | 6C8 | Abcam | mouse monoclonal | Western |
| Anti-GAPDH | Ab8245 | Abcam | mouse monoclonal | Western |
| Anti-TOM20 | Sc-11415 | Santa Cruz Biotech | rabbit polyclonal | Western |
| Anti-NY-ESO-1 | E978 | Abcam | mouse monoclonal | Western |
| Anti-ATPB | Ab14730 | Abcam | mouse monoclonal | Western |
| Anti H-2Kb-OVA257-264 | 25-D1.16 | Biolegend |  | FACS |
| Anti CD8 | 53-6.7 | Biolegend |  | FACS |
| Anti CD8 beta | 53-5.8 | Biolegend |  | FACS |
| Anti CD69 | H1.2F3 | Biolegend |  | FACS |
| Anti CD25 | 3C7 | Biolegend |  | FACS |
| Anti CD105 | MJ7/18 | Biolegend |  | FACS |
| B220 | RA3-6B2 | Biolegend |  | FACS |
| Anti CD44 | IM7 | Biolegend |  | FACS |
| Anti CD69 | H1.2F3 | Biolegend |  | FACS |
| Anti IFN | XMG1.2 | eBioscience |  | FACS |
| Anti TNF | MP6-XT22 | eBioscience |  | FACS |
| Viability stain | LIVE/DEADTM  Fixable nIR | Invitrogen |  | FACS |
| Anti CD8 | 2.43 | Invivomab |  | In vivo cell depletion |
| Isotype control |  | Invivomab |  | In vivo cell Depletion |

**Table S1 Antibody list**

| Cancer type | Number of patients |
| --- | --- |
| Acute Myeloid Leukemia | 143 |
| Adrenocortical Cancer | 92 |
| Bile Duct Cancer | 51 |
| Bladder Cancer | 412 |
| Breast Cancer | 986 |
| Cervical Cancer | 289 |
| Colon Cancer | 399 |
| Endometrioid Cancer | 530 |
| Esophageal Cancer | 184 |
| Glioblastoma | 393 |
| Head and Neck Cancer | 508 |
| Kidney Chromophobe | 66 |
| Kidney Clear Cell Carcinoma | 336 |
| Kidney Papillary Cell Carcinoma | 281 |
| Large B-cell Lymphoma | 37 |
| Liver Cancer | 364 |
| Lower Grade Glioma | 508 |
| Lung Adenocarcinoma | 567 |
| Lung Squamous Cell Carcinoma | 492 |
| Melanoma | 467 |
| Mesothelioma | 82 |
| Ocular melanomas | 80 |
| Ovarian Cancer | 436 |
| Pancreatic Cancer | 178 |
| Rectal Cancer | 137 |
| Sarcoma | 237 |
| Stomach Cancer | 437 |
| Testicular Cancer | 144 |
| Thymoma | 123 |
| Thyroid Cancer | 492 |
| Uterine Carcinosarcoma | 57 |

**Table S2** The somatic mutation data (version 02-04-2018) included 9,508 samples from 31 cancer types, number of patients for each cancer are reported.

Supplementary methods

**RNA extraction**

Cell pellets of the B16 cell lines were washed in PBS and underwent a freeze-thaw cycle before being resuspended in 350μL Buffer RLT (Qiagen). RNA was subsequently extracted using the RNeasy Kit (Qiagen) following the manufacturer’s instructions. The concentration of extracted RNA was measured using NanoDrop ONEc (Thermo Scientific).

**Reverse transcription PCR**

500ng of RNA in 10μL nuclease free water was added to the reverse transcription mastermix prepared from the High-Capacity RT-PCR kit with RNase inhibitors (Applied Biosystems) following the manufacturer’s instructions. Briefly, the mastermix was prepared as follows:

| *Component* | *Volume per reaction (total volume 10uL)* |
| --- | --- |
| 10X RT Buffer | 2μL |
| 10X Random Primers | 2μL |
| RNase inhibitors | 1μL |
| Multiscribe Reverse transcriptase | 1μL |
| dNTPs | 0.8μL |
| Nuclease free water | 3.2μL |

The reverse transcription reaction was carried out on the ProFlex PCR System (Applied Biosystems by Life Technology) using the following program:

| *Step* | *Temperature (****°****C)* | *Duration (min)* |
| --- | --- | --- |
| 1 | 25 | 10 |
| 2 | 37 | 120 |
| 3 | 85 | 5 |
| 4 | 4 | ∞ |

**qPCR**

Assuming 100% efficiency of the reverse transcriptase PCR, 10ng of cDNA in 5μL nuclease free water was loaded per well of a qPCR plate (MicroAMP® Fast Optical 96-well Reaction Plate with Bardcode (0.01mL)). TaqMan probes using the FAM reporter system (Applied Biosystems by Life Technology) were diluted 20X into TaqMan Fast Advanced Master Mix (Thermo Fisher Scientific) and 5uL were loaded into each well. The TaqMan probes used: were:

| *Gene* | *Cat#* |
| --- | --- |
| HPRT | Mm03024075_m1 |
| Ovalbumin | Gg03366804_m1 |
| Ovalbumin | Gg03366808_m1 |

Each 5μL cDNA or probes mixture was added as a drop just below the lip of well on opposite sides of the well. The plate was pulsed in a centrifuge to pull down and combine the drops, sealed using MicroAmpTM Optical Adhesive Film (Applied Biosystems by Life Technology), and run on the QuantStudio 7Flex (Applied Biosystems by Life Technology) B16-GFP was used as the control sample and HPRT as the housekeeping gene. The fold change was calculated using the ΔΔCT method.

**Lymph nodes digestion and DC staining**

Lymph nodes from B16 mtOVA-mCherry or WT tumor-bearing mice, were carefully dissected and cleaned of fat. Inguinal lymph nodes were pierced and torn with sharp forceps in 24-well plates and incubated for 15 min at 37 C in 1 ml of digestion buffer (2 mg/ml collagenase D, and 1 mg/ml DNAse I in RPMI-1640 (both from Sigma-Aldrich). After the first 15 minutes of incubation, cells were pipetted up and down repeatedly, then returned for a second 15-min incubation at 37 C. After digestion, LN were washed with RPMI-1640 plus 10% fetal calf serum (FCS) and filtered through 70-mm filters before staining for flow cytometry. For surface staining, cells were incubated with anti-Fc receptor antibody (clone 2.4G2) and then stained with antibodies in PBS plus 2% FCS for 30 min on ice. DC were stained with anti CD11b (clone M1/70, BD biosciences), anti B220 (clone RA3-6B2), anti CD3 (clone 17A2), anti CD11c (clone N418), F4/80 (clone BM8), anti CD8α (clone 53-6.7), anti CD103 (clone 2E7), anti CD169 (clone 3D6.112) (all from Biolegend),viability was assessed by staining with fixable LIVE/DEADTM  Fixable Near-IR stain (Invitrogen).
